# Supplementary material for: Rat Mesenchymal Stromal Cell Sheets Suppress Renal Fibrosis via Microvascular Protection
Source: PubMed Central journal article supplement — Stem Cells Transl Med. 2019 Nov 1;8(12):1330–41. doi: 10.1002/sctm.19-0113 (PMC6877761; doi:10.1002/sctm.19-0113), 2019-11-01

# Supplemental Figure 1

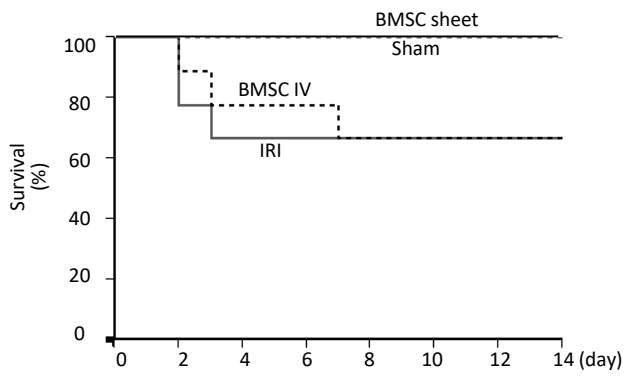

# Supplemental Figure 2

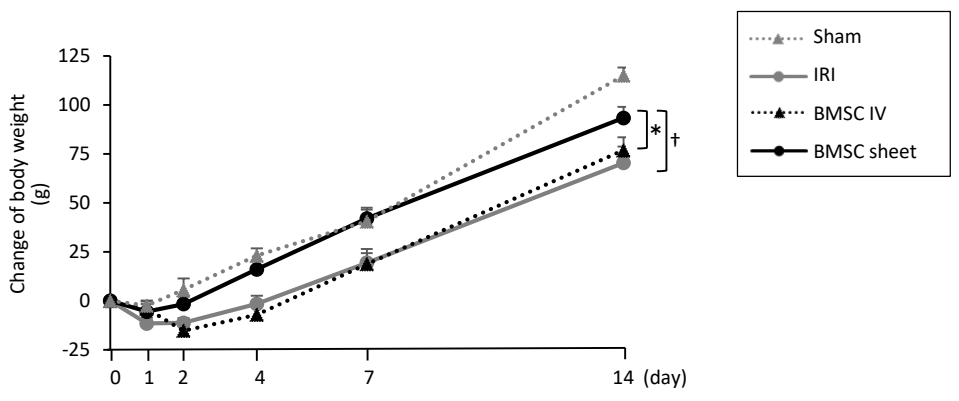

# Supplemental Figure 3

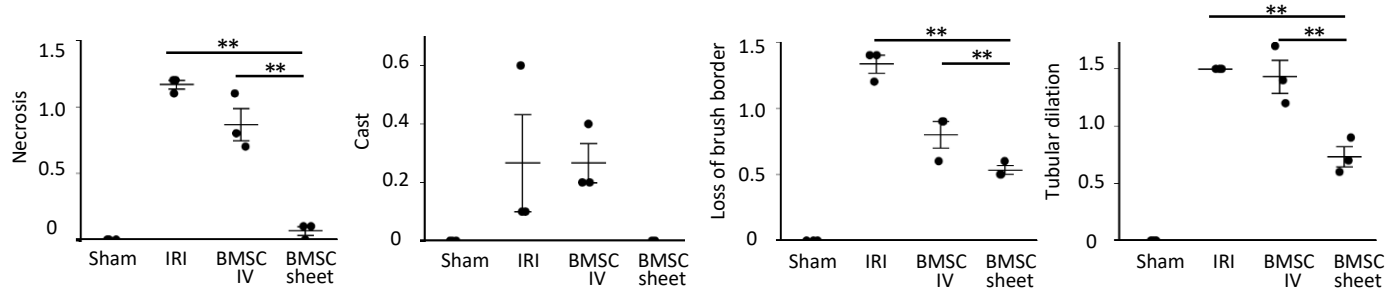

# Supplemental Figure 4

IRI

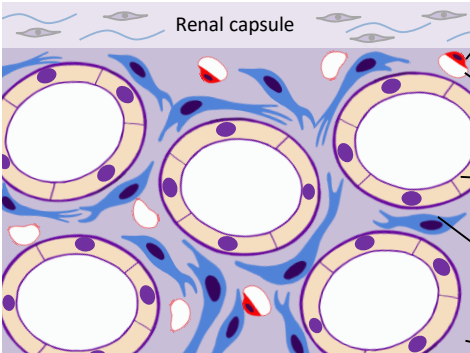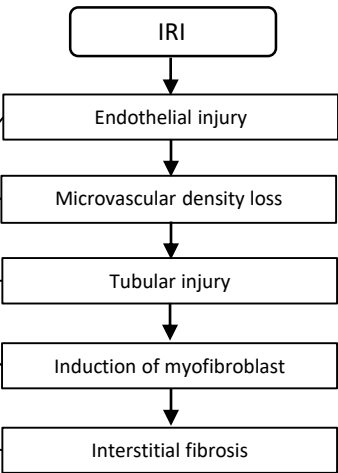

BMSC sheet

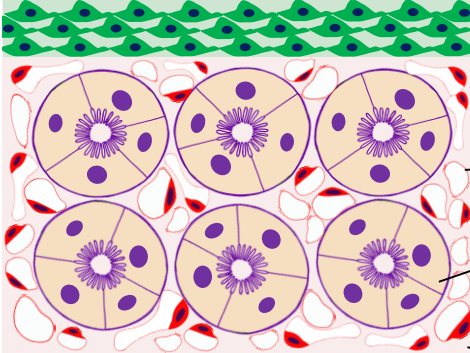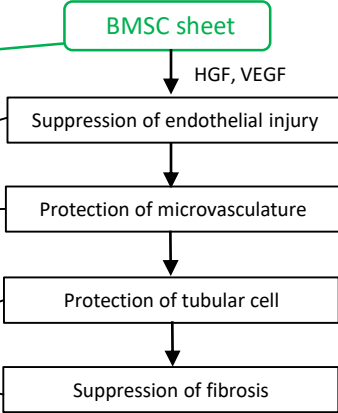

Supplement: SCT3-8-1330-s002.pdf [file SCT3-8-1330-s002.pdf]
